# Supplementary material for: Analysis of Genetic Diversity of Fescue Populations from the Highlands of Bolivia Using EST-SSR Markers
Source: MDPI journal article supplement (doi:10.3390/genes13122311), 2022-12-08
Supplement: s1 [file s1]

**Table S1.** Populations of *Festuca* analyzed in the present study and the geographic locations and altitudes of the seed collection sites in the highlands of Bolivia.

| Population | Department | Site           | Geographic location |             | Altitude | Biogeographic province |
|------------|------------|----------------|---------------------|-------------|----------|------------------------|
|            |            |                | LAT (S)             | LON (W)     |          |                        |
| 1          | Oruro      | Caracollo      | 17 39 20.3S         | 67 13 36.5W | 3771     | Xerophytic Puna        |
| 2          | Oruro      | La Joya        | 17 42 26.2S         | 67 16 10.4W | 3770     | Xerophytic Puna        |
| 3          | Oruro      | Condoriquiña   | 17 31 43.2S         | 67 15 14.5W | 3957     | Xerophytic Puna        |
| 4          | Oruro      | Callipampa     | 18 26 21.0S         | 66 58 19.5W | 3715     | Xerophytic Puna        |
| 5          | Oruro      | Sora Sora      | 18 09 33.1S         | 66 59 11.2W | 3757     | Xerophytic Puna        |
| 10         | Oruro      | Chilliwani     | 17 37 51.6S         | 67 13 45.6W | 3799     | Xerophytic Puna        |
| 24         | Oruro      | Illapaya       | 17 38 55.7S         | 67 11 55.3W | 3777     | Xerophytic Puna        |
| 25         | Oruro      | Caracollo      | 17 36 18.7S         | 67 15 57.2W | 3839     | Xerophytic Puna        |
| 35         | Oruro      | Toraca baja    | 18 09 59.6S         | 66 59 39.0W | 3742     | Xerophytic Puna        |
| 11         | La Paz     | Comanche       | 16 51 35.5S         | 68 25 46.0W | 3970     | Mesophytic Puna        |
| 14         | La Paz     | Puerto Perez   | 16 17 30.5S         | 68 34 00.6W | 3829     | Mesophytic Puna        |
| 15         | La Paz     | Igachi         | 16 17 41.3S         | 68 33 08.5W | 3834     | Mesophytic Puna        |
| 16         | La Paz     | Achica arriba  | 16 46 35.0S         | 68 10 52.6W | 3927     | Mesophytic Puna        |
| 17         | La Paz     | Querani        | 16 13 39.1S         | 68 30 22.4W | 3971     | Mesophytic Puna        |
| 18         | La Paz     | Chirioco       | 16 23 49.3S         | 68 22 01.2W | 3929     | Mesophytic Puna        |
| 19         | La Paz     | Orkojipiña     | 16 31 44.2S         | 68 20 53.7W | 3862     | Mesophytic Puna        |
| 20         | La Paz     | El Tholar      | 16 59 29.4S         | 68 04 28.4W | 3979     | Mesophytic Puna        |
| 21         | La Paz     | Sica Sica      | 17 19 05.1S         | 67 46 02.7W | 3906     | Mesophytic Puna        |
| 26         | La Paz     | Comanche       | 16 57 28.4S         | 68 25 23.9W | 4037     | Mesophytic Puna        |
| 27         | La Paz     | Konchamarca    | 17 22 29.8S         | 67 27 27.5W | 3987     | Mesophytic Puna        |
| 28         | La Paz     | Konchamarca    | 17 22 29.7S         | 67 27 28.8W | 3981     | Mesophytic Puna        |
| 13         | La Paz     | Chirapaca      | 16 17 59.5S         | 68 30 14.1W | 3885     | Mesophytic Puna        |
| 29         | Potosí     | Kucho Ingenio  | 19 52 52.3S         | 65 40 58.9W | 3659     | Xerophytic Puna        |
| 30         | Potosí     | Janko Huaje    | 19 49 40.4S         | 65 35 57.0W | 3918     | Xerophytic Puna        |
| 31         | Potosí     | Janko Huaje    | 19 50 48.2S         | 65 34 15.3W | 3577     | Xerophytic Puna        |
| 32         | Potosí     | Cerro rico     | 19 37 25.2S         | 65 44 02.2W | 4316     | Xerophytic Puna        |
| 33         | Potosí     | Totorapampa    | 19 26 44.5S         | 65 51 26.9W | 3566     | Xerophytic Puna        |
| 34         | Potosí     | Tambo Alcalá   | 19 19 34.6S         | 66 02 04.1W | 4072     | Xerophytic Puna        |
| 6          | Cochabamba | Tiraque        | 17 27 23.9S         | 65 43 09.8W | 3217     | Mesophytic Puna        |
| 7          | Cochabamba | Sankayani alto | 17 25 32.9S         | 65 37 41.9W | 3930     | Mesophytic Puna        |
| 8          | Cochabamba | Laguna alta    | 17 24 08.4S         | 65 36 58.2W | 4073     | Mesophytic Puna        |
| 9          | Cochabamba | Toralapa       | 17 28 50.3S         | 65 37 08.9W | 3673     | Mesophytic Puna        |
| 12         | Cochabamba | Cruce Tiraque  | 17 23 51.9S         | 65 51 58.6W | 3689     | Mesophytic Puna        |
| 22         | Cochabamba | Cumbre         | 17 41 18.8S         | 66 47 04.4W | 4325     | Mesophytic Puna        |
| 23         | Cochabamba | Melga          | 17 25 33.2S         | 65 54 57.4W | 3338     | Mesophytic Puna        |
| 36         | Cochabamba | Villa Junin    | 17 24 31.4S         | 65 42 45.3W | 3406     | Mesophytic Puna        |
| 37         | Cochabamba | Boqueron Khasa | 17 29 16.7S         | 65 36 41.5W | 3641     | Mesophytic Puna        |
| 38         | Cochabamba | Vacas          | 17 31 03.0S         | 65 36 48.2W | 3790     | Mesophytic Puna        |
| 39         | Cochabamba | Normal Vacas   | 17 31 59.2S         | 65 36 12.8W | 3751     | Mesophytic Puna        |
| 40         | Cochabamba | Salida Vacas   | 17 33 06.8S         | 65 36 19.9W | 3585     | Mesophytic Puna        |
| 41         | Cochabamba | Sunjani        | 17 10 12.6S         | 66 21 08.4W | 3974     | Mesophytic Puna        |

|    |            |               |             |             |      |                 |
|----|------------|---------------|-------------|-------------|------|-----------------|
| 42 | Cochabamba | Peñas         | 17 09 20.6S | 66 25 57.2W | 4193 | Mesophytic Puna |
| 43 | Cochabamba | Parque Tunari | 17 16 15.9S | 66 19 49.7W | 3809 | Mesophytic Puna |

---

LAT (S) = latitude (south of Equator), LON (W) = longitude (west of Meridian).
